# Supplementary material for: Macrocyclization of N,N′-propylenebis(3-formyl-5-tert-butylsalicylaldimine): a ratiometric fluorescence chemodosimeter for ZnII
Source: Royal Society of Chemistry journal article supplement (doi:10.1039/c6ra05478a), 2016-01-01
Supplement: c6ra05478a1.pdf [file c6ra05478a1.pdf]

## Supplementary information

### Macrocyclization of N, N'-propylenebis(3-formyl-5-*tert*-butylsalicylaldimine): a ratiometric fluorescence chemodosimeter for Zn<sup>II</sup>†

Sudhanshu Das,<sup>a</sup> Jaydeep Adhikary,<sup>a</sup> Prateeti Chakraborty,<sup>a,b</sup> Tonmoy Chakraborty,<sup>a</sup> Debasis Das<sup>\*,a</sup>

<sup>a</sup> Department of Chemistry, University of Calcutta, 92 A. P. C. Road, Kolkata-700 009, India. E-mail: [dasdebasis2001@yahoo.com](mailto:dasdebasis2001@yahoo.com)

<sup>b</sup> Department of Chemistry, Amity University, Newtown, Kolkata, West Bengal 700156 92, India

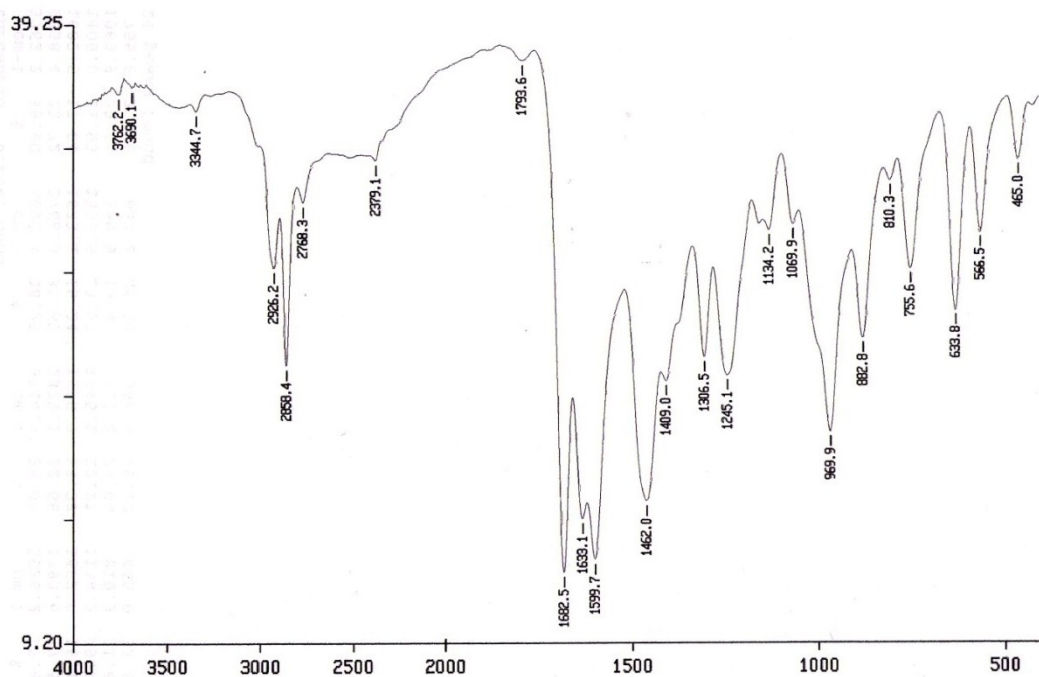

Fig. S1 FTIR spectra of ligand (H<sub>2</sub>L).

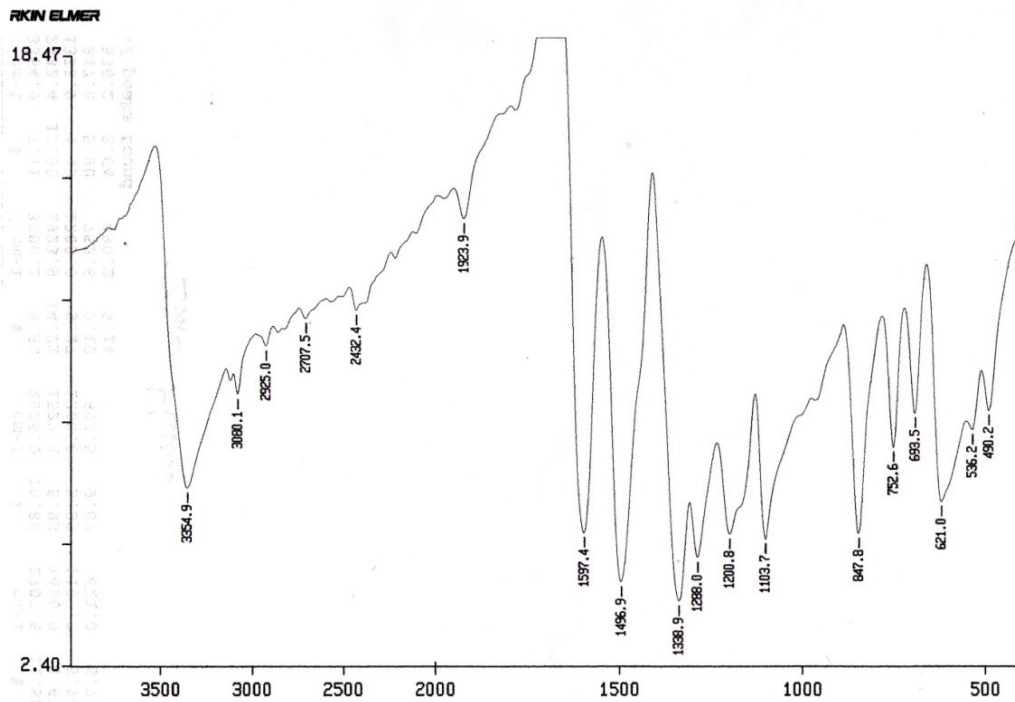

Fig. S2 IR spectra of complex 1

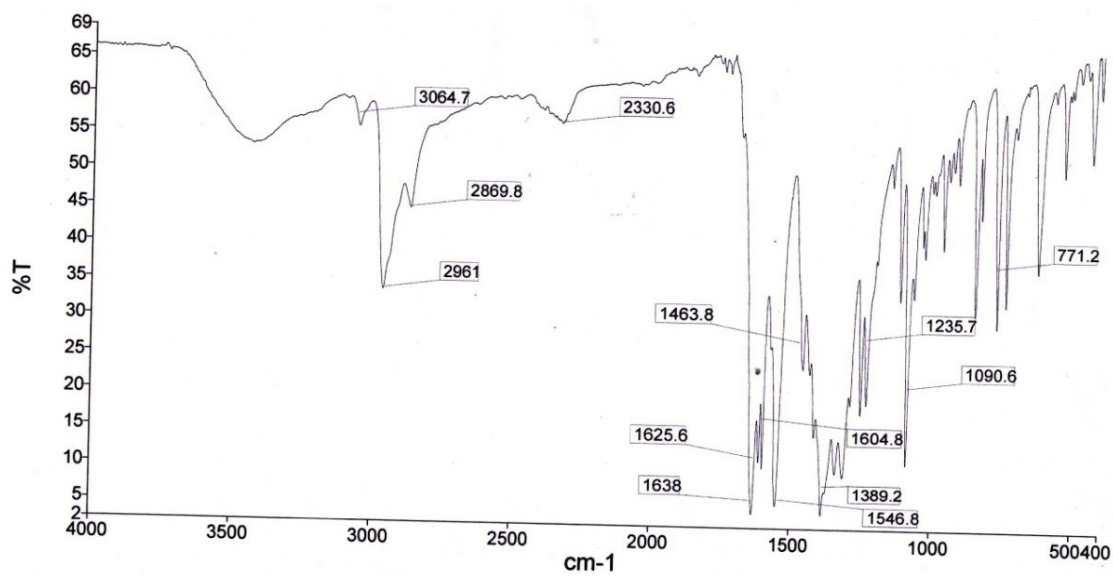

Fig. S3 IR spectra of complex 2.

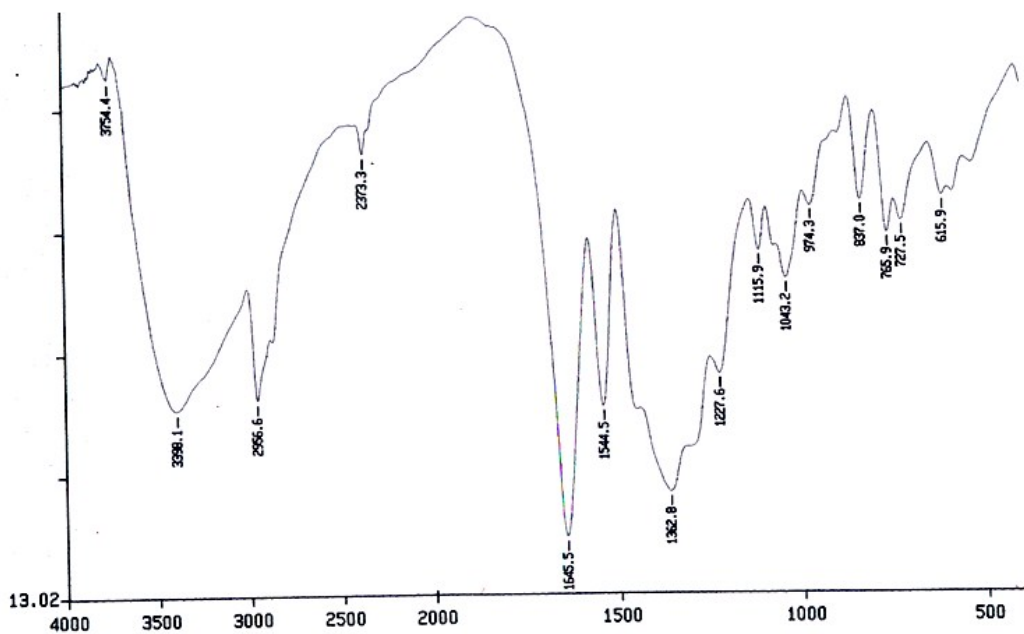

**Fig. S4** IR spectra of complex 3.

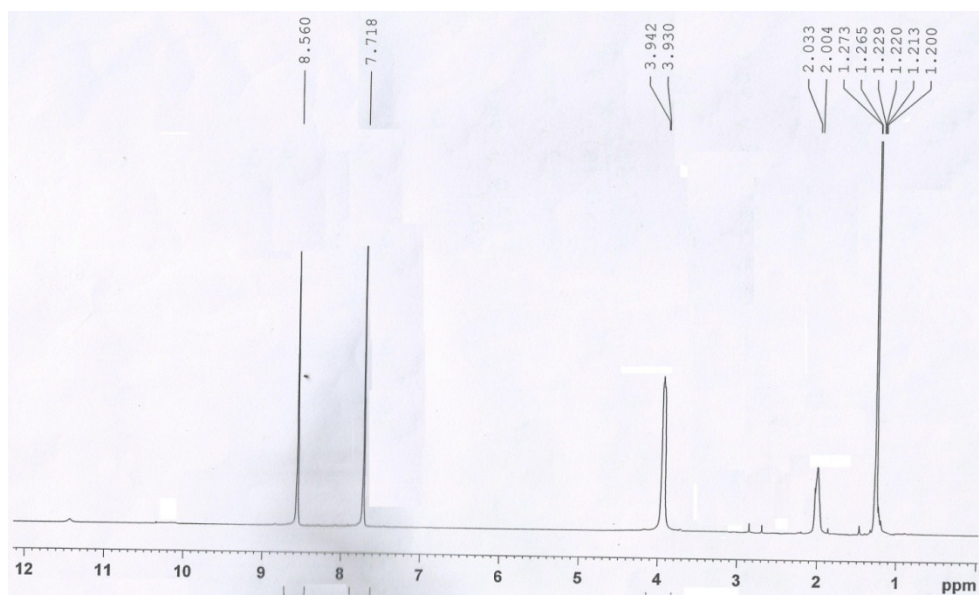

**Fig. S5**  $^1\text{H}$  NMR spectrum with pure Zn crystal.

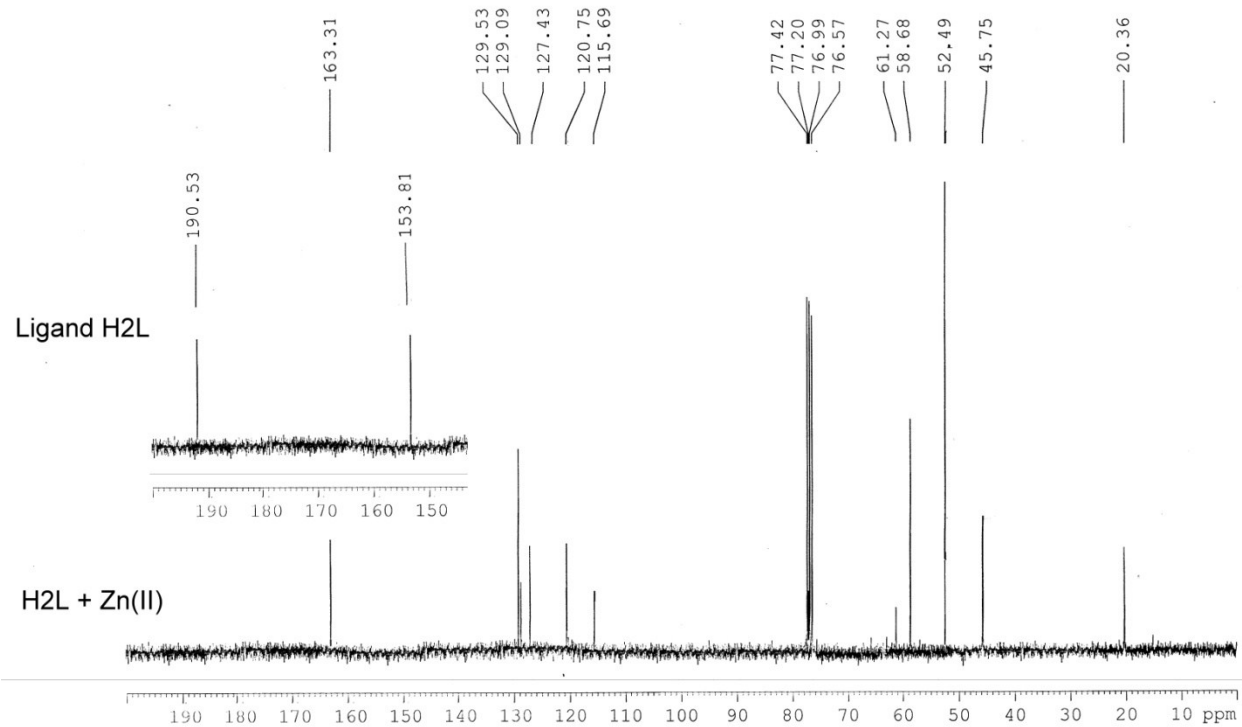

Fig. S6  $^{13}\text{C}$  NMR of H<sub>2</sub>L and mixture.

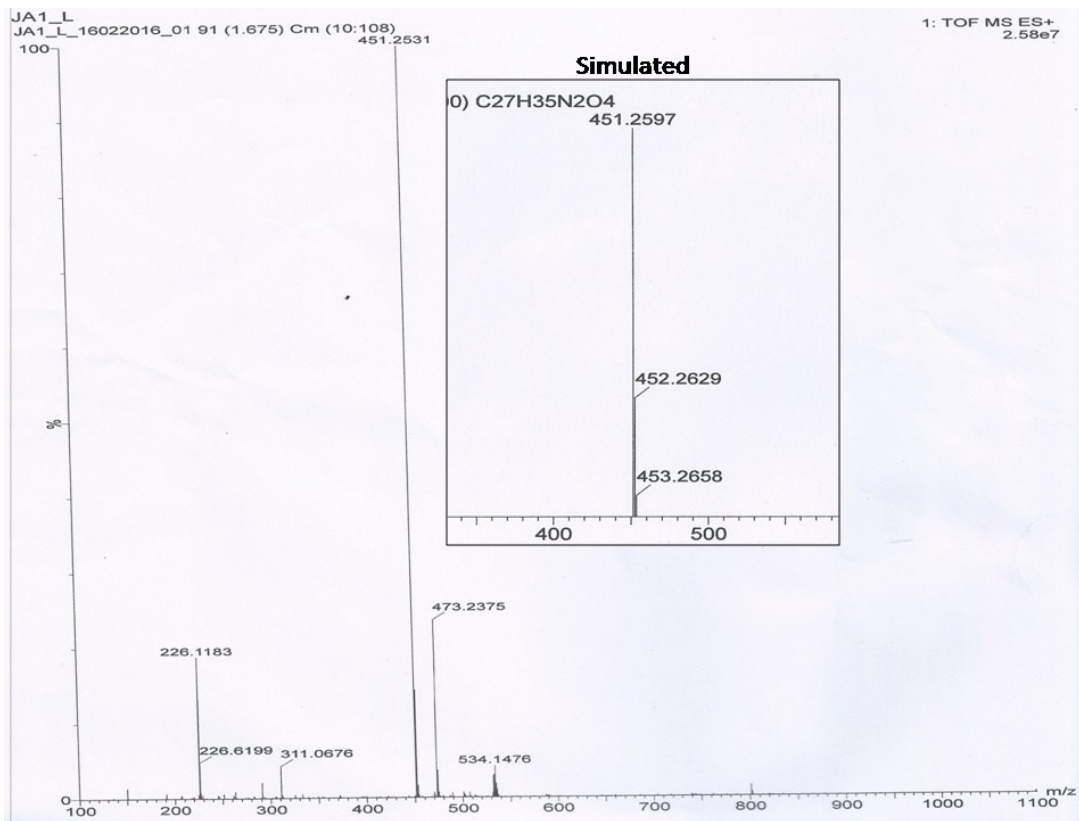

**Fig. S7** High Resolution Mass Spectra of ligand (H<sub>2</sub>L) in 50:50 water-acetonitrile.

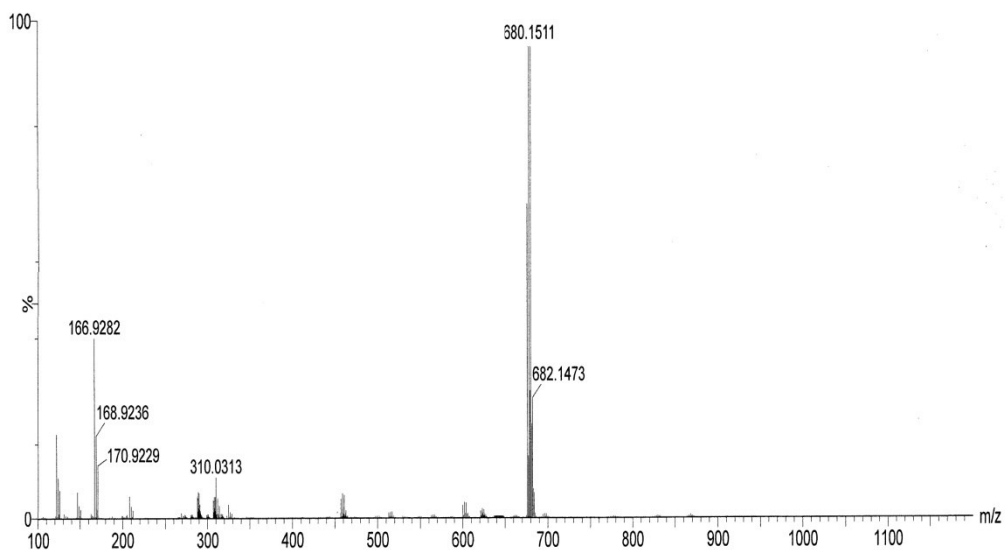

**Fig S8.** ESI- MS spectra of ligand and zinc nitrate mixture in 50:50 water-acetonitrile after 20 minutes of mixing.

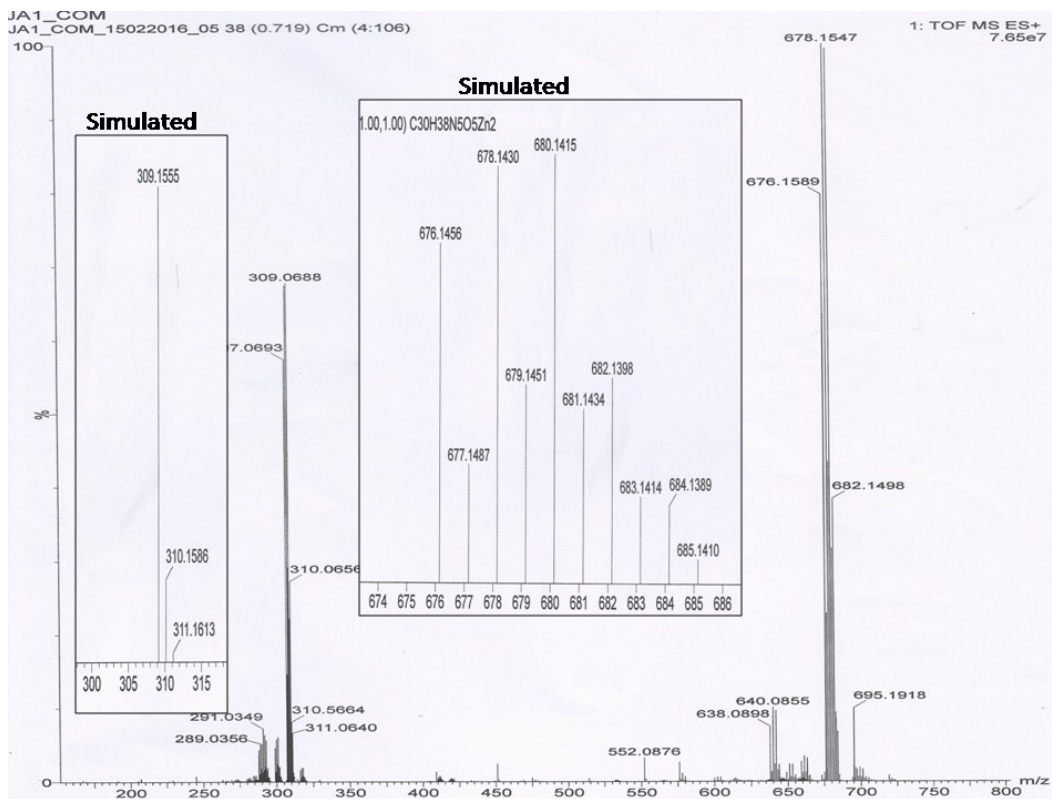

**Fig. S9** ESI-MS Spectrum of zinc complex (**1**) in 50:50 water-acetonitrile.

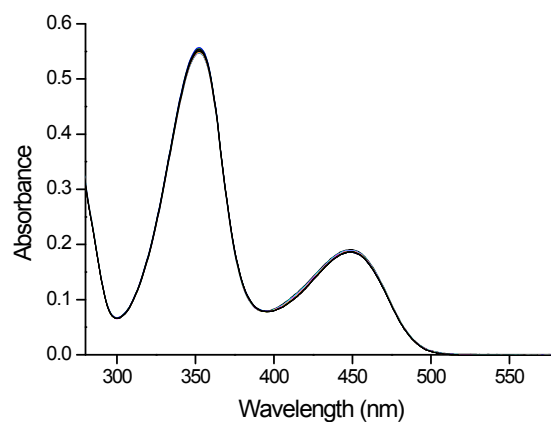

**Fig. S10** Change in UV-Vis spectrum of ligand  $H_2L$  without the addition of zinc salt.

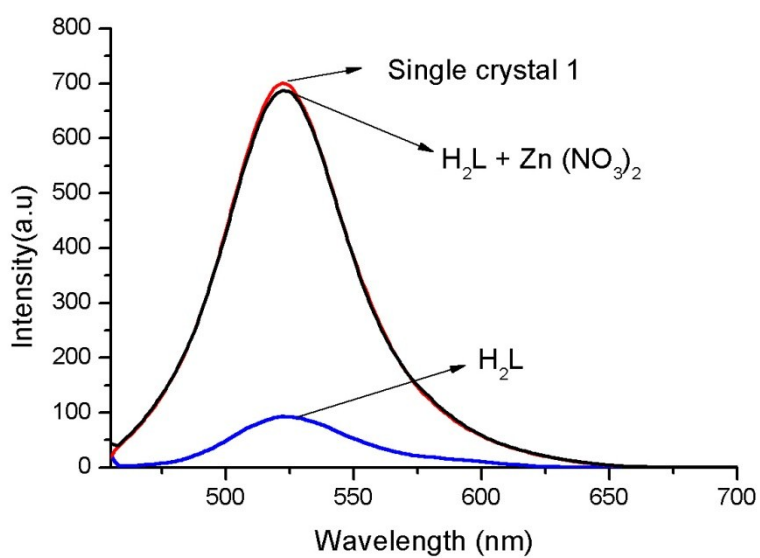

**Fig. S11** Photoluminescence spectra of  $H_2L$ ;  $H_2L + Zn(NO_3)_2$  and complex **1** (using single crystals).
